# Supplementary material for: HIV-1 competition experiments in humanized mice show that APOBEC3H imposes selective pressure and promotes virus adaptation
Source: PubMed Central journal article supplement (PMC5435363; doi:10.1371/journal.ppat.1006348), 2017-05-05
Supplement: ppat.1006348.s011.pdf [file ppat.1006348.s011.pdf]

**Table S1. Humanized mice used in Figures 1 and 2.**

| Mouse no. | Recipient mouse |      | Transplanted hHSCs§ |              | APOBEC3H haplotype |              | Inoculated age (weeks) |
|-----------|-----------------|------|---------------------|--------------|--------------------|--------------|------------------------|
|           | Lot no.*        | Sex† | Donor lot‡          | No. of cells |                    |              |                        |
| 1         | 235             | F    | A                   | 150,000      | III / V            | Stable       | 18                     |
| 2         | 235             | M    | A                   | 150,000      | III / V            | Stable       | 18                     |
| 3         | 238             | F    | B                   | 120,000      | I / II             | Stable       | 13                     |
| 4         | 238             | F    | B                   | 120,000      | I / II             | Stable       | 13                     |
| 5         | 238             | M    | B                   | 120,000      | I / II             | Stable       | 13                     |
| 6         | 243             | M    | B                   | 230,000      | I / II             | Stable       | 14                     |
| 7         | 243             | M    | B                   | 230,000      | I / II             | Stable       | 14                     |
| 8         | 243             | M    | B                   | 230,000      | I / II             | Stable       | 14                     |
| 9         | 234             | M    | C                   | 135,000      | I / I              | Intermediate | 18                     |
| 10        | 253             | M    | C                   | 160,000      | I / I              | Intermediate | 15                     |
| 11        | 253             | M    | C                   | 160,000      | I / I              | Intermediate | 15                     |
| 12        | 253             | M    | C                   | 160,000      | I / I              | Intermediate | 15                     |
| 13        | 241             | F    | D                   | 140,000      | I / VI             | Intermediate | 14                     |
| 14        | 250             | M    | E                   | 100,000      | I / I              | Intermediate | 14                     |

\* Seven lots of newborn NOG mice were used for the recipient.

† F, female; M, male.

‡ NOG-hCD34 mice were reconstructed with one of 5 donors.

§ hHSCs, human CD34<sup>+</sup> hematopoietic stem cells.
