# Supplementary material for: HIV-1 competition experiments in humanized mice show that APOBEC3H imposes selective pressure and promotes virus adaptation
Source: PubMed Central journal article supplement (PMC5435363; doi:10.1371/journal.ppat.1006348), 2017-05-05
Supplement: ppat.1006348.s012.pdf [file ppat.1006348.s012.pdf]

**Table S2. Percentage of hyper Vif derivatives in stable A3H humanized mice co-inoculated with hyper and hypo HIV-1s.**

| Mouse no.*     | Donor lot* | <i>APOBE3H</i> haplotype |        | # Analyzed sequence | # Hyper Vif derivatives | % Hyper Vif derivatives | #Hypo Vif derivatives | % Hypo Vif derivatives | # Hypo Vif derivatives with anti-A3H activity† | % Vif with anti-A3H-II activity‡ |
|----------------|------------|--------------------------|--------|---------------------|-------------------------|-------------------------|-----------------------|------------------------|------------------------------------------------|----------------------------------|
| 1              | A          | III / V                  | Stable | 38                  | 35                      | 92.1                    | 3                     | 7.9                    | 1                                              | <b>94.7</b>                      |
| 2              | A          | III / V                  | Stable | 64                  | 40                      | 62.5                    | 24                    | 37.5                   | 1                                              | <b>64.1</b>                      |
| 3              | B          | I / II                   | Stable | 52                  | 30                      | 57.7                    | 22                    | 42.3                   | 1                                              | <b>59.6</b>                      |
| 4              | B          | I / II                   | Stable | 49                  | 43                      | 87.8                    | 6                     | 12.2                   | 0                                              | <b>87.8</b>                      |
| 5              | B          | I / II                   | Stable | 52                  | 17                      | 32.7                    | 35                    | 67.3                   | 23                                             | <b>76.9</b>                      |
| 6              | B          | I / II                   | Stable | 47                  | 44                      | 93.6                    | 3                     | 6.4                    | 0                                              | <b>93.6</b>                      |
| 7              | B          | I / II                   | Stable | 40                  | 34                      | 85.0                    | 6                     | 15.0                   | 2                                              | <b>90.0</b>                      |
| 8              | B          | I / II                   | Stable | 49                  | 43                      | 87.8                    | 6                     | 12.2                   | 0                                              | <b>87.8</b>                      |
| <b>Average</b> |            |                          |        | 391                 | 286                     | <b>73.1</b>             | 105                   | <b>26.9</b>            | 28                                             | <b>80.3</b>                      |
| <b>SEM</b>     |            |                          |        |                     |                         | <b>7.7</b>              |                       | <b>7.7</b>             |                                                | <b>4.8</b>                       |

\* Identical to Figure 1 and Table S1.

† Number of hyper Vif derivatives acquiring anti-A3H-II activity (Figures 1E-1G).

‡ Percentage of hyper Vif derivatives and the hyper Vif derivatives acquiring anti-A3H-II activity.
