# Supplementary material for: HIV-1 competition experiments in humanized mice show that APOBEC3H imposes selective pressure and promotes virus adaptation
Source: PubMed Central journal article supplement (PMC5435363; doi:10.1371/journal.ppat.1006348), 2017-05-05
Supplement: ppat.1006348.s013.pdf [file ppat.1006348.s013.pdf]

**Table S3. Summary of the sequences of hypo Vif derivatives detected in intermediate A3H humanized mice co-inoculated with hyper and hypo HIV-1s.**

| Mouse no.        | Sequence (nucleotide) | # detected |
|------------------|-----------------------|------------|
| 9                | Parental              | 19         |
|                  | g11a                  | 1          |
|                  | g21a/a96g/g115t/g226a | 1          |
|                  | t88c                  | 2          |
|                  | g115t                 | 1          |
|                  | a142c/g480a           | 1          |
|                  | c316t                 | 1          |
|                  | t321c/g480a           | 1          |
|                  | c356t                 | 1          |
|                  | a401g                 | 1          |
|                  | a503t                 | 1          |
|                  | a565g                 | 1          |
|                  | 10                    | Parental   |
| t86c             |                       | 1          |
| t92c/g115t/a142c |                       | 1          |
| g115t            |                       | 1          |
| a275g            |                       | 1          |
| a542t            |                       | 1          |
| g551a            |                       | 1          |
| g553a            |                       | 1          |
| 11               | Parental              | 22         |
|                  | g115t                 | 1          |
|                  | c140a                 | 4          |
|                  | a142c                 | 1          |
|                  | a142c/c185g           | 1          |
|                  | a302g                 | 1          |
|                  | t387c                 | 3          |
|                  | c406t                 | 1          |
|                  | a464c                 | 1          |
| 12               | Parental              | 21         |
|                  | c129a/c140t/a263g     | 1          |
|                  | a142c                 | 4          |
|                  | g181a                 | 3          |
|                  | c214a                 | 1          |
|                  | a263g                 | 2          |
|                  | t339c                 | 2          |
| 13               | Parental              | 13         |
|                  | t29c                  | 1          |
|                  | t93c                  | 1          |
|                  | c185g                 | 2          |

Note that hypo Vif derivatives were not detected in mouse no. 14.
