# Supplementary material for: HIV-1 competition experiments in humanized mice show that APOBEC3H imposes selective pressure and promotes virus adaptation
Source: PubMed Central journal article supplement (PMC5435363; doi:10.1371/journal.ppat.1006348), 2017-05-05
Supplement: ppat.1006348.s014.pdf [file ppat.1006348.s014.pdf]

**Table S4. Percentage of hyper Vif derivatives in intermediate A3H humanized mice co-inoculated with hyper and hypo HIV-1s.**

| Mouse no.*     | Donor lot* | <i>APOBE3H</i> haplotype |              | # Analyzed sequence | # Hyper Vif derivatives | % Hyper Vif derivatives | #Hypo Vif derivatives | % Hypo Vif derivatives | # Hypo Vif derivatives with anti-A3H activity | % Vif with anti-A3H-II activity† |
|----------------|------------|--------------------------|--------------|---------------------|-------------------------|-------------------------|-----------------------|------------------------|-----------------------------------------------|----------------------------------|
| 9              | C          | I/I                      | Intermediate | 33                  | 2                       | 6.1                     | 31                    | 93.9                   | 0                                             | <b>6.1</b>                       |
| 10             | C          | I/I                      | Intermediate | 47                  | 18                      | 38.3                    | 29                    | 61.7                   | 0                                             | <b>38.3</b>                      |
| 11             | C          | I/I                      | Intermediate | 49                  | 14                      | 28.6                    | 35                    | 71.4                   | 0                                             | <b>28.6</b>                      |
| 12             | C          | I/I                      | Intermediate | 47                  | 13                      | 27.7                    | 34                    | 72.3                   | 0                                             | <b>27.7</b>                      |
| 13             | D          | I/VI                     | Intermediate | 50                  | 33                      | 66.0                    | 17                    | 34.0                   | 0                                             | <b>66.0</b>                      |
| 14             | E          | I/I                      | Intermediate | 47                  | 47                      | 100.0                   | 0                     | 0.0                    | 0                                             | <b>100.0</b>                     |
| <b>Average</b> |            |                          |              | 273                 | 127                     | <b>46.5</b>             | 146                   | <b>53.5</b>            |                                               | <b>46.5</b>                      |
| <b>SEM</b>     |            |                          |              |                     |                         | <b>13.7</b>             |                       | <b>13.7</b>            |                                               | <b>13.7</b>                      |

\* Identical to Figure 2 and Table S1.

† Percentage of hyper Vif derivatives and the hypo Vif derivatives acquiring anti-A3H-II activity.
