# Supplementary material for: HIV-1 competition experiments in humanized mice show that APOBEC3H imposes selective pressure and promotes virus adaptation
Source: PubMed Central journal article supplement (PMC5435363; doi:10.1371/journal.ppat.1006348), 2017-05-05
Supplement: ppat.1006348.s015.pdf [file ppat.1006348.s015.pdf]

**Table S5. Humanized mice used in Figures 3 and S10.**

| Mouse no. | Recipient mouse |      | Transplanted hHSCs§ (donor lot‡) | <i>APOBEC3H</i> haplotype |              | Peak VL# | Virus inoculated | Reference  |
|-----------|-----------------|------|----------------------------------|---------------------------|--------------|----------|------------------|------------|
|           | Lot no.*        | Sex† |                                  |                           |              |          |                  |            |
| 15        | 105             | M    | F                                | II / II                   | Stable       | 5.90     | AD8              | 23         |
| 16        | 105             | M    | F                                | II / II                   | Stable       | 6.68     | AD8              | 23         |
| 17        | 128             | F    | G                                | II / IV                   | Stable       | 6.59     | AD8              | 23         |
| 18        | 128             | M    | G                                | II / IV                   | Stable       | 6.34     | AD8              | 23         |
| 19        | 129             | F    | G                                | II / IV                   | Stable       | 6.75     | AD8              | 23         |
| 20        | 129             | M    | G                                | II / IV                   | Stable       | 6.01     | AD8              | 23         |
| 21        | 80              | M    | H                                | I / II                    | Stable       | 5.56     | JRCSF            | 12         |
| 22        | 156             | F    | H                                | I / II                    | Stable       | 4.72     | NLCSFV3          | 24         |
| 23        | 156             | M    | H                                | I / II                    | Stable       | 5.20     | NLCSFV3          | 24         |
| 24        | 157             | F    | H                                | I / II                    | Stable       | 5.39     | NLCSFV3          | 24         |
| 25        | 157             | M    | H                                | I / II                    | Stable       | 5.60     | NLCSFV3          | 24         |
| 26        | 160             | F    | H                                | I / II                    | Stable       | 4.81     | NL4-3            | 12         |
| 27        | 160             | M    | H                                | I / II                    | Stable       | 4.78     | NL4-3            | 12         |
| 28        | 108             | F    | I                                | I / I                     | Intermediate | 5.75     | AD8              | 23         |
| 29        | 108             | M    | I                                | I / I                     | Intermediate | 5.27     | AD8              | 23         |
| 30        | 119             | F    | I                                | I / I                     | Intermediate | 6.06     | AD8              | 23         |
| 31        | 106             | M    | J                                | I / IV                    | Intermediate | 5.76     | AD8              | 23         |
| 32        | 110             | M    | K                                | I / IV                    | Intermediate | 4.58     | AD8              | 23         |
| 33        | 110             | M    | K                                | I / IV                    | Intermediate | 4.64     | AD8              | 23         |
| 34        | 126             | M    | L                                | I / I                     | Intermediate | 6.68     | AD8              | 23         |
| 35        | 126             | M    | L                                | I / I                     | Intermediate | 4.40     | AD8              | 23         |
| 36        | 126             | F    | L                                | I / I                     | Intermediate | 5.60     | AD8              | 23         |
| 37        | 127             | F    | L                                | I / I                     | Intermediate | 5.86     | AD8              | 23         |
| 38        | 127             | F    | L                                | I / I                     | Intermediate | 6.41     | AD8              | 23         |
| 39        | 168             | F    | M                                | I / III                   | Intermediate | 6.33     | AD8              | This study |
| 40        | 168             | F    | M                                | I / III                   | Intermediate | 6.68     | AD8              | This study |
| 41        | 173             | F    | M                                | I / III                   | Intermediate | 5.37     | AD8              | This study |
| 42        | 191             | M    | N                                | I / I                     | Intermediate | 6.55     | AD8              | This study |
| 43        | 192             | M    | N                                | I / I                     | Intermediate | 6.03     | AD8              | This study |
| 44        | 192             | M    | N                                | I / I                     | Intermediate | 5.86     | AD8              | This study |
| 45        | 165             | M    | M                                | I / III                   | Intermediate | 6.47     | JRCSF            | This study |
| 46        | 179             | M    | O                                | I / IV                    | Intermediate | 6.51     | JRCSF            | This study |
| 47        | 191             | F    | P                                | I / I                     | Intermediate | 6.19     | JRCSF            | This study |
| 48        | 191             | F    | P                                | I / I                     | Intermediate | 6.04     | JRCSF            | This study |
| 49        | 191             | M    | P                                | I / I                     | Intermediate | 6.51     | JRCSF            | This study |
| 50        | 136             | F    | Q                                | I / IV                    | Intermediate | 5.95     | NLCSFV3          | 24         |
| 51        | 136             | M    | Q                                | I / IV                    | Intermediate | 6.37     | NLCSFV3          | 24         |
| 52        | 135             | F    | L                                | I / I                     | Intermediate | 5.81     | NLCSFV3          | 24         |
| 53        | 224             | M    | R                                | I / I                     | Intermediate | 6.72     | NLCSFV3          | This study |
| 54        | 225             | F    | S                                | I / I                     | Intermediate | 5.88     | NLCSFV3          | This study |
| 55        | 227             | F    | T                                | I / IV                    | Intermediate | 5.11     | NLCSFV3          | This study |
| 56        | 159             | F    | M                                | I / III                   | Intermediate | 3.96     | NL4-3            | 12         |
| 57        | 159             | F    | M                                | I / III                   | Intermediate | 5.68     | NL4-3            | 12         |
| 58        | 165             | M    | M                                | I / III                   | Intermediate | 4.96     | NL4-3            | 12         |
| 59        | 162             | F    | U                                | I / IV                    | Intermediate | 6.13     | NL4-3            | 12         |
| 60        | 162             | M    | U                                | I / IV                    | Intermediate | 5.47     | NL4-3            | 12         |
| 61        | 163             | F    | U                                | I / IV                    | Intermediate | 5.56     | NL4-3            | 12         |
| 62        | 163             | F    | U                                | I / IV                    | Intermediate | 4.56     | NL4-3            | 12         |
| 63        | 164             | F    | U                                | I / IV                    | Intermediate | 5.75     | NL4-3            | 12         |
| 64        | 166             | F    | U                                | I / IV                    | Intermediate | 5.83     | NL4-3            | 12         |
| 65        | 135             | M    | L                                | I / I                     | Intermediate | 6.11     | 4A               | 24         |
| 66        | 225             | F    | T                                | I / IV                    | Intermediate | 6.12     | 4A               | This study |

\* Twenty-nine lots of newborn NOG mice were used for the recipient.

† F, female; M, male.

‡ NOG-hCD34 mice were reconstructed with one of 16 donors.

§ hHSCs, human CD34<sup>+</sup> hematopoietic stem cells.

# Peak viral load, copies/ml plasma (log<sub>10</sub>).
