# Supplementary material for: HIV-1 competition experiments in humanized mice show that APOBEC3H imposes selective pressure and promotes virus adaptation
Source: PubMed Central journal article supplement (PMC5435363; doi:10.1371/journal.ppat.1006348), 2017-05-05
Supplement: ppat.1006348.s016.pdf [file ppat.1006348.s016.pdf]

**Table S6. Percentage of hyper Vif derivatives in stable A3H humanized mice infected with HIV-1 NLCSFV3.**

| Mouse no.*     | Donor lot* | <i>APOBE3H</i> haplotype |        | # Analyzed sequence | # Vif derivatives with anti-A3H activity† | % Vif with anti-A3H-II activity‡ |
|----------------|------------|--------------------------|--------|---------------------|-------------------------------------------|----------------------------------|
| 22             | H          | I / II                   | Stable | 58                  | 32                                        | <b>55.2</b>                      |
| 23             | H          | I / II                   | Stable | 60                  | 39                                        | <b>65.0</b>                      |
| 24             | H          | I / II                   | Stable | 64                  | 45                                        | <b>70.3</b>                      |
| 25             | H          | I / II                   | Stable | 61                  | 29                                        | <b>47.5</b>                      |
| <b>Average</b> |            |                          |        | 243                 | 145                                       | <b>59.7</b>                      |
| <b>SEM</b>     |            |                          |        |                     |                                           | <b>5.1</b>                       |

\* Identical to Figure 3 and Table S5.

† Number of Vif derivatives acquiring anti-A3H-II activity (Figures 3C-3E).

‡ Percentage of Vif derivatives acquiring anti-A3H-II activity.
