# Supplementary material for: HIV-1 competition experiments in humanized mice show that APOBEC3H imposes selective pressure and promotes virus adaptation
Source: PubMed Central journal article supplement (PMC5435363; doi:10.1371/journal.ppat.1006348), 2017-05-05
Supplement: ppat.1006348.s017.pdf [file ppat.1006348.s017.pdf]

**Table S7. Percentage of hyper Vif derivatives in intermediate A3H humanized mice infected with HIV-1 NLCSFV3.**

| Mouse no.*     | Donor lot* | <i>APOBE3H</i> haplotype |              | # Analyzed sequence | # Vif derivatives with anti-A3H activity | % Vif with anti-A3H-II activity† |
|----------------|------------|--------------------------|--------------|---------------------|------------------------------------------|----------------------------------|
| 50             | Q          | I / IV                   | Intermediate | 42                  | 0                                        | 0.0                              |
| 51             | Q          | I / IV                   | Intermediate | 49                  | 0                                        | 0.0                              |
| 52             | L          | I / I                    | Intermediate | 27                  | 0                                        | 0.0                              |
| <b>Average</b> |            |                          |              | 118                 | 0                                        | 0.0                              |
| <b>SEM</b>     |            |                          |              |                     |                                          | 0.0                              |

\* Identical to Figure S5A and Table S5.

† Percentage of hyper Vif derivatives and the hyper Vif derivatives acquiring anti-A3H-II activity.
