# Supplementary material for: HIV-1 competition experiments in humanized mice show that APOBEC3H imposes selective pressure and promotes virus adaptation
Source: PubMed Central journal article supplement (PMC5435363; doi:10.1371/journal.ppat.1006348), 2017-05-05
Supplement: ppat.1006348.s018.pdf [file ppat.1006348.s018.pdf]

**Table S8. Top 50 annotations of GSEA analysis.**

| ID                | Description*                                        | Q value         |
|-------------------|-----------------------------------------------------|-----------------|
| <b>GO:0007159</b> | <b>leukocyte cell-cell adhesion</b>                 | <b>0.000029</b> |
| <b>GO:0050900</b> | <b>leukocyte migration</b>                          | <b>0.000199</b> |
| GO:0007229        | integrin-mediated signaling pathway                 | 0.000199        |
| GO:0051270        | regulation of cellular component movement           | 0.000199        |
| GO:0002274        | myeloid leukocyte activation                        | 0.000266        |
| GO:0040012        | regulation of locomotion                            | 0.000266        |
| GO:0030334        | regulation of cell migration                        | 0.000270        |
| GO:0050865        | regulation of cell activation                       | 0.000270        |
| GO:2000145        | regulation of cell motility                         | 0.000366        |
| GO:0002521        | leukocyte differentiation                           | 0.000405        |
| GO:0002694        | regulation of leukocyte activation                  | 0.000470        |
| GO:0050867        | positive regulation of cell activation              | 0.000594        |
| GO:0016337        | cell-cell adhesion                                  | 0.001030        |
| GO:0002696        | positive regulation of leukocyte activation         | 0.001135        |
| <b>GO:0042110</b> | <b>T cell activation</b>                            | <b>0.001651</b> |
| GO:0051249        | regulation of lymphocyte activation                 | 0.002116        |
| <b>GO:0046649</b> | <b>lymphocyte activation</b>                        | <b>0.002116</b> |
| GO:0002252        | immune effector process                             | 0.002218        |
| <b>GO:0006954</b> | <b>inflammatory response</b>                        | <b>0.002663</b> |
| <b>GO:0050852</b> | <b>T cell receptor signaling pathway</b>            | <b>0.003578</b> |
| <b>GO:0030098</b> | <b>lymphocyte differentiation</b>                   | <b>0.003905</b> |
| GO:0051251        | positive regulation of lymphocyte activation        | 0.003905        |
| GO:0009617        | response to bacterium                               | 0.004720        |
| GO:0007160        | cell-matrix adhesion                                | 0.005231        |
| GO:0016044        | cellular membrane organization                      | 0.005231        |
| GO:0061024        | membrane organization                               | 0.005343        |
| GO:0042119        | neutrophil activation                               | 0.005619        |
| GO:0002444        | myeloid leukocyte mediated immunity                 | 0.006113        |
| GO:0007163        | establishment or maintenance of cell polarity       | 0.006113        |
| GO:0002757        | immune response-activating signal transduction      | 0.006335        |
| GO:0002764        | immune response-regulating signaling pathway        | 0.006398        |
| GO:0050870        | positive regulation of T cell activation            | 0.006468        |
| GO:0030099        | myeloid cell differentiation                        | 0.006607        |
| GO:0051607        | defense response to virus                           | 0.007301        |
| GO:0046631        | alpha-beta T cell activation                        | 0.007504        |
| GO:0051272        | positive regulation of cellular component movement  | 0.007651        |
| GO:0031347        | regulation of defense response                      | 0.007942        |
| GO:0002573        | myeloid leukocyte differentiation                   | 0.008997        |
| GO:0001816        | cytokine production                                 | 0.009114        |
| GO:0050863        | regulation of T cell activation                     | 0.010051        |
| GO:0030155        | regulation of cell adhesion                         | 0.010051        |
| GO:0032675        | regulation of interleukin-6 production              | 0.012167        |
| <b>GO:0042102</b> | <b>positive regulation of T cell proliferation</b>  | <b>0.013117</b> |
| <b>GO:0032635</b> | <b>interleukin-6 production</b>                     | <b>0.013117</b> |
| GO:0070661        | leukocyte proliferation                             | 0.013907        |
| GO:0030029        | actin filament-based process                        | 0.013908        |
| GO:0048872        | homeostasis of number of cells                      | 0.014327        |
| GO:0030217        | T cell differentiation                              | 0.014680        |
| GO:0002275        | myeloid cell activation involved in immune response | 0.017955        |
| GO:0030168        | platelet activation                                 | 0.017955        |

\* The descriptions written in bold are summarized in Figure 4B.
