# Supplementary material for: HIV-1 competition experiments in humanized mice show that APOBEC3H imposes selective pressure and promotes virus adaptation
Source: PubMed Central journal article supplement (PMC5435363; doi:10.1371/journal.ppat.1006348), 2017-05-05
Supplement: ppat.1006348.s019.pdf [file ppat.1006348.s019.pdf]

**Table S9. Amino acid residues positioned at 39 and 48 of the 24 IMCs used in this study.**

| Group | Subtype | Category* | Strain†     | Residues |    | Anti-A3H-II activity‡ | Reference§ |
|-------|---------|-----------|-------------|----------|----|-----------------------|------------|
|       |         |           |             | 39       | 48 |                       |            |
| M     | B       |           | Hyper HIV-1 | F        | H  | +                     | 25411794   |
| M     | B       |           | Hypo HIV-1  | V        | N  | -                     | 25411794   |
| M     | B       |           | NLCSFV3     | F        | N  | -                     | 9847335    |
| M     | B       |           | JRCSF       | I        | N  | -                     | 3646751    |
| M     | B       |           | AD8         | V        | N  | -                     | 8835195    |
| M     | B       | TF        | AD17        | S        | H  | -                     | 18256145   |
| M     | B       | TF        | CH470       | F        | H  | +                     | 23542380   |
| M     | B       | TF        | REJO        | F        | H  | +                     | 19487424   |
| M     | B       | TF        | RHPA        | W        | H  | -                     | 19487424   |
| M     | B       | TF        | CH058       | F        | H  | +                     | 19487424   |
| M     | B       | TF        | WITO        | F        | H  | +                     | 19487424   |
| M     | B       | CC        | CH058-6mo   | F        | H  | +                     | 19487424   |
| M     | B       | CC        | MCST        | S        | H  | -                     | 23542380   |
| M     | C       | TF        | ZM247v2     | F        | H  | +                     | 20485520   |
| M     | C       | TF        | CH042       | F        | H  | +                     | 23542380   |
| M     | C       | TF        | CH185       | Y        | H  | +                     | 23542380   |
| M     | C       | TF        | CH200v1     | F        | H  | +                     | 23542380   |
| M     | C       | CC        | CH269       | F        | H  | +                     | 23542380   |
| M     | C       | CC        | CH293       | F        | H  | +                     | 23542380   |
| M     | C       | CC        | CH440       | F        | H  | +                     | 23542380   |
| N     |         |           | DJO0131     | Y        | H  | -                     | 23308067   |
| O     |         |           | BCF183      | Y        | N  | +                     | X          |
| O     |         |           | RBF206      | L        | N  | +                     | X          |
| P     |         |           | RBF168      | F        | H  | +                     | GQ328744   |

\* TF, transmitted/founder; CC, chronic control.

† Hyper HIV-1 and hypo HIV-1 is based on strain NLCSFV3.

‡ Determined by the experiments shown in Figures 5C and S3.

§ For the reference of each virus, PMIDs (<https://www.ncbi.nlm.nih.gov/pubmed>) are listed. For RBF168, GenBank accession number is listed. X, not available.
