# Supplementary material for: HIV-1 competition experiments in humanized mice show that APOBEC3H imposes selective pressure and promotes virus adaptation
Source: PubMed Central journal article supplement (PMC5435363; doi:10.1371/journal.ppat.1006348), 2017-05-05
Supplement: ppat.1006348.s020.pdf [file ppat.1006348.s020.pdf]

**Table S10. Percentage of hyper Vif in HIV-1 subtypes and groups deposited in HIV-1 sequence database.**

| Group | Subtype | # Vif*  |             | % Hyper Vif |
|-------|---------|---------|-------------|-------------|
|       |         | # Total | # Hyper Vif |             |
| M     | A1      | 199     | 96          | <b>48.2</b> |
| M     | A2      | 6       | 3           | <b>50.0</b> |
| M     | B       | 1954    | 739         | <b>37.8</b> |
| M     | C       | 566     | 434         | <b>76.7</b> |
| M     | D       | 74      | 17          | <b>23.0</b> |
| M     | F1      | 118     | 51          | <b>43.2</b> |
| M     | F2      | 8       | 8           | <b>100</b>  |
| M     | G       | 42      | 28          | <b>66.7</b> |
| M     | H       | 5       | 3           | <b>60.0</b> |
| M     | J       | 2       | 0           | <b>0</b>    |
| M     | K       | 2       | 1           | <b>50.0</b> |
| M     |         | 2976    | 1380        | <b>46.4</b> |
| N     |         | 7       | 6           | <b>85.7</b> |
| O     |         | 51      | 0           | <b>0</b>    |
| P     |         | 2       | 2           | <b>100</b>  |

\* The data was extracted from HIV-1 sequence database (<https://www.hiv.lanl.gov/components/sequence/HIV/search/search.html>). "Hyper Vif" is defined as the sequence possessing F or Y at position 39 and H at position 48.
