# Supplementary material for: HIV-1 competition experiments in humanized mice show that APOBEC3H imposes selective pressure and promotes virus adaptation
Source: PubMed Central journal article supplement (PMC5435363; doi:10.1371/journal.ppat.1006348), 2017-05-05
Supplement: ppat.1006348.s021.pdf [file ppat.1006348.s021.pdf]

**Table S11. Proportion of stable A3H individuals in each population and region.**

| Population*                                              | Region*       | # Individual† |     |      |       | % Stable A3H‡ |
|----------------------------------------------------------|---------------|---------------|-----|------|-------|---------------|
|                                                          |               | Total         | S/S | S/UI | UI/UI |               |
| Americans of African Ancestry in SW USA                  | Africa        | 61            | 13  | 30   | 18    | <b>70.5</b>   |
| Utah Residents (CEPH) with Northern and Western Ancestry | Europe        | 85            | 1   | 15   | 69    | <b>18.8</b>   |
| Han Chinese in Beijing, China                            | Asia          | 97            | 2   | 13   | 82    | <b>15.5</b>   |
| Southern Han Chinese                                     | Asia          | 100           | 1   | 13   | 86    | <b>14.0</b>   |
| Colombians from Medellin, Colombia                       | North America | 60            | 3   | 10   | 47    | <b>21.7</b>   |
| Finnish in Finland                                       | Europe        | 93            | 5   | 20   | 68    | <b>26.9</b>   |
| British in England and Scotland                          | Europe        | 89            | 0   | 25   | 64    | <b>28.1</b>   |
| Iberian Population in Spain                              | Europe        | 14            | 1   | 3    | 10    | <b>28.6</b>   |
| Japanese in Tokyo, Japan                                 | Asia          | 89            | 0   | 16   | 73    | <b>18.0</b>   |
| Luhya in Webuye, Kenya                                   | Africa        | 97            | 25  | 52   | 20    | <b>79.4</b>   |
| Mexican Ancestry from Los Angeles USA                    | North America | 66            | 1   | 7    | 58    | <b>12.1</b>   |
| Puerto Ricans from Puerto Rico                           | North America | 55            | 1   | 14   | 40    | <b>27.3</b>   |
| Toscani in Italia                                        | Europe        | 98            | 2   | 17   | 79    | <b>19.4</b>   |
| Yoruba in Ibadan, Nigeria                                | Africa        | 88            | 35  | 37   | 16    | <b>81.8</b>   |
|                                                          | Total         | 1092          | 90  | 272  | 730   |               |

\* Population and region are defined in the website of 1000 Genomes Project.

† The data was extracted from 1000 Genomes Project (<http://www.internationalgenome.org>). S, stable (haplotypes II, V, and VII); UI, unstable (haplotypes III, IV, and VI) and intermediate (haplotype I).

‡ The individuals with S/S and S/UI are determined as "stable A3H".
