# Supplementary material for: HIV-1 competition experiments in humanized mice show that APOBEC3H imposes selective pressure and promotes virus adaptation
Source: PubMed Central journal article supplement (PMC5435363; doi:10.1371/journal.ppat.1006348), 2017-05-05
Supplement: ppat.1006348.s022.pdf [file ppat.1006348.s022.pdf]

**Table S12. Proportions of hyper HIV-1 and stable A3H individuals in each region and country.**

| Country/region* | # Individual* |     |      |       | % Stable A3H† | # Vif‡  |             | % Hyper Vif |
|-----------------|---------------|-----|------|-------|---------------|---------|-------------|-------------|
|                 | Total         | S/S | S/UI | UI/UI |               | # Total | # Hyper Vif |             |
| Kenya           | 97            | 25  | 52   | 20    | <b>79.4</b>   | 75      | 45          | <b>60.0</b> |
| Nigeria         | 88            | 35  | 37   | 16    | <b>81.8</b>   | 8       | 7           | <b>87.5</b> |
| Spain           | 14            | 1   | 3    | 10    | <b>28.6</b>   | 52      | 14          | <b>26.9</b> |
| United Kingdom  | 89            | 0   | 25   | 64    | <b>28.1</b>   | 11      | 5           | <b>45.5</b> |
| Italy           | 98            | 2   | 17   | 79    | <b>19.4</b>   | 3       | 0           | <b>0</b>    |
| United States   | 212           | 15  | 52   | 145   | <b>31.6</b>   | 917     | 417         | <b>45.5</b> |
| China           | 197           | 3   | 26   | 168   | <b>14.7</b>   | 97      | 43          | <b>44.3</b> |
| Japan           | 89            | 0   | 16   | 73    | <b>18.0</b>   | 46      | 16          | <b>34.8</b> |
| Africa          |               |     |      |       | <b>78.0</b>   |         |             | <b>68.8</b> |
| Europe          |               |     |      |       | <b>23.5</b>   |         |             | <b>37.3</b> |
| North America   |               |     |      |       | <b>19.9</b>   |         |             | <b>45.2</b> |
| Asia            |               |     |      |       | <b>15.7</b>   |         |             | <b>28.5</b> |

\* The data was extracted from 1000 Genomes Project (<http://www.internationalgenome.org>). S, stable (haplotypes II, V, and VII); UI, unstable (haplotypes III, IV, and VI) and intermediate (haplotype I). See also Table S11.

† The individuals with S/S and S/UI are determined as "stable A3H".

‡ The data was extracted from HIV-1 sequence database

(<https://www.hiv.lanl.gov/components/sequence/HIV/search/search.html>). "Hyper Vif" is defined as the sequence possessing F or Y at position 39 and H at position 48.
